# Supplementary material for: High-performance ionic conductive poly(vinyl alcohol) hydrogels for flexible strain sensors based on a universal soaking strategy
Source: Royal Society of Chemistry journal article supplement (doi:10.1039/d0qm00625d), 2020-09-29
Supplement: d0qm00625d1.pdf [file d0qm00625d1.pdf]

## Supporting information

Xiang Di<sup>a</sup>, Qiyue Ma<sup>a</sup>, Yue Xu<sup>a</sup>, Mingming Yang<sup>a</sup>, Guolin Wu<sup>a,\*</sup>, Pingchuan Sun<sup>a,\*</sup>

Key Laboratory of Functional Polymer Materials, Institute of Polymer Chemistry,  
College of Chemistry, Nankai University, Tianjin 300071, P. R. China.

E-mail: guolinwu@nankai.edu.cn; Fax: +86 22 23502749; Tel: +86 22 23507746

Table S1. Compositions of different PVA-NaCl hydrogels

| Hydrogel | PVA (g) | H <sub>2</sub> O (g) | Soaking time (min) |
|----------|---------|----------------------|--------------------|
| PVA-3%   | 0.6     | 19.4                 | 0                  |
| PVA-7%   | 1.4     | 18.6                 | 0                  |
| PVA-10%  | 2       | 18                   | 0                  |
| PVA-N-x  | 2       | 18                   | x                  |

Unless otherwise specified, the number of crystallizations is 3 times.

The soaking solution is a saturated sodium chloride solution

Table S2. Component fit of different PVA-NaCl hydrogels

| Hydrogel    | Three components fit |               |           |               |           |               |
|-------------|----------------------|---------------|-----------|---------------|-----------|---------------|
|             | $f_i$ (%)            | $T_{2r}$ (ms) | $f_l$ (%) | $T_{2i}$ (ms) | $f_s$ (%) | $T_{2s}$ (ms) |
| PVA-1st-F/T | 5.04%                | 0.0124        | 1.89%     | 0.054         | 93.07%    | 1.91          |
| PVA-2nd-F/T | 8.52%                | 0.0120        | 4.4%      | 0.063         | 87.08%    | 1.28          |
| PVA-3rd-F/T | 10.07%               | 0.0132        | 5.73%     | 0.069         | 84.2%     | 1.17          |
| PVA-3-N-10  | 28.21%               | 0.0132        | 13.86%    | 0.06          | 57.93%    | 0.69          |
| PVA-3-N-40  | 29.57%               | 0.0135        | 13.54%    | 0.06          | 56.89%    | 0.7           |

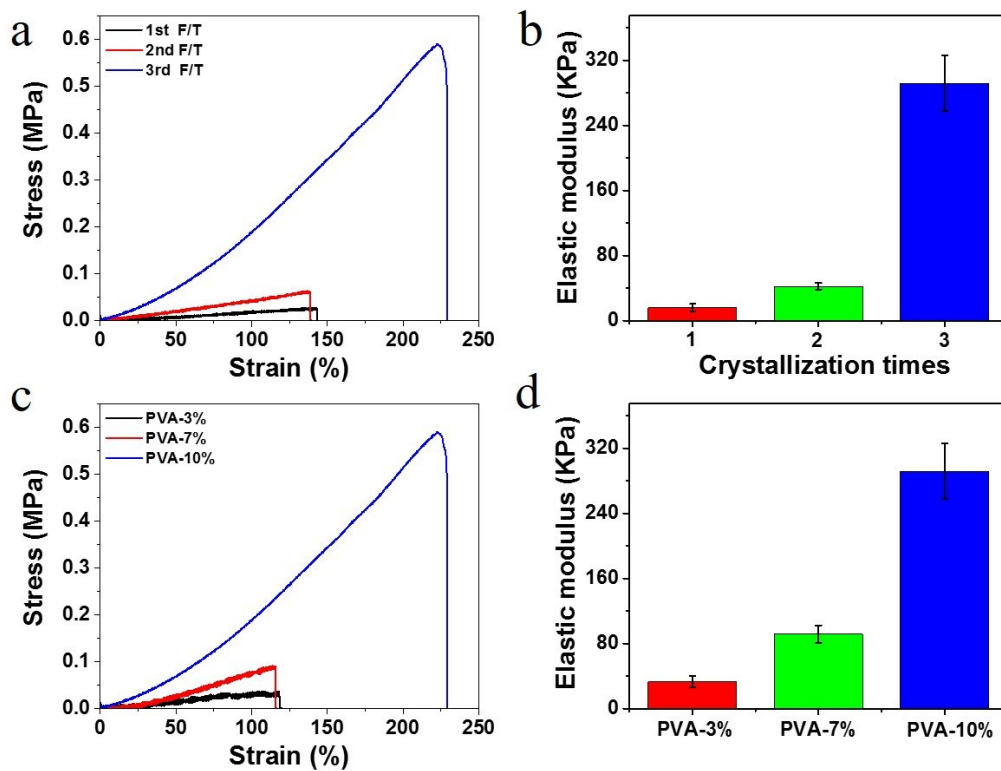

**Figure S1.** (a) Tensile curves and (b) elastic modulus of PVA hydrogel with different crystallization times (PVA content: 10 wt%). (c) Tensile curves and (d) elastic modulus of PVA hydrogel with different content of PVA (Three times of crystallization).

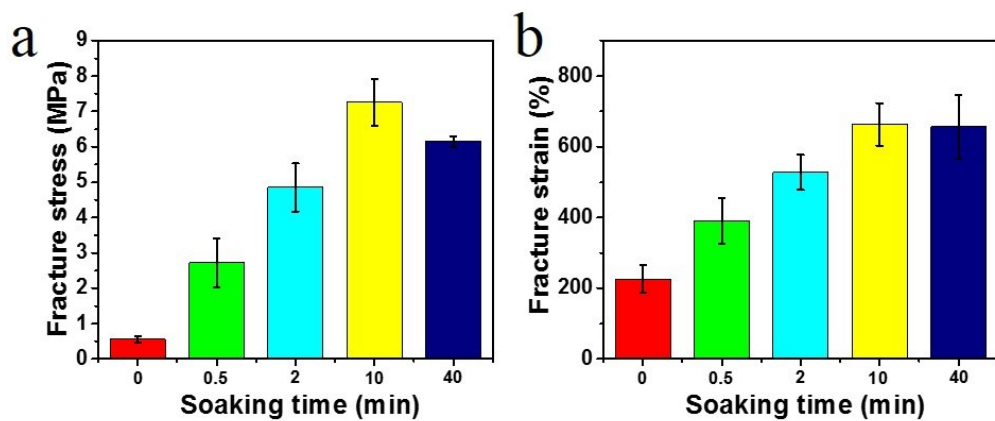

**Figure S2.** (a) Fracture stress and (b) fracture strain of PVA-N hydrogel versus soaking time.

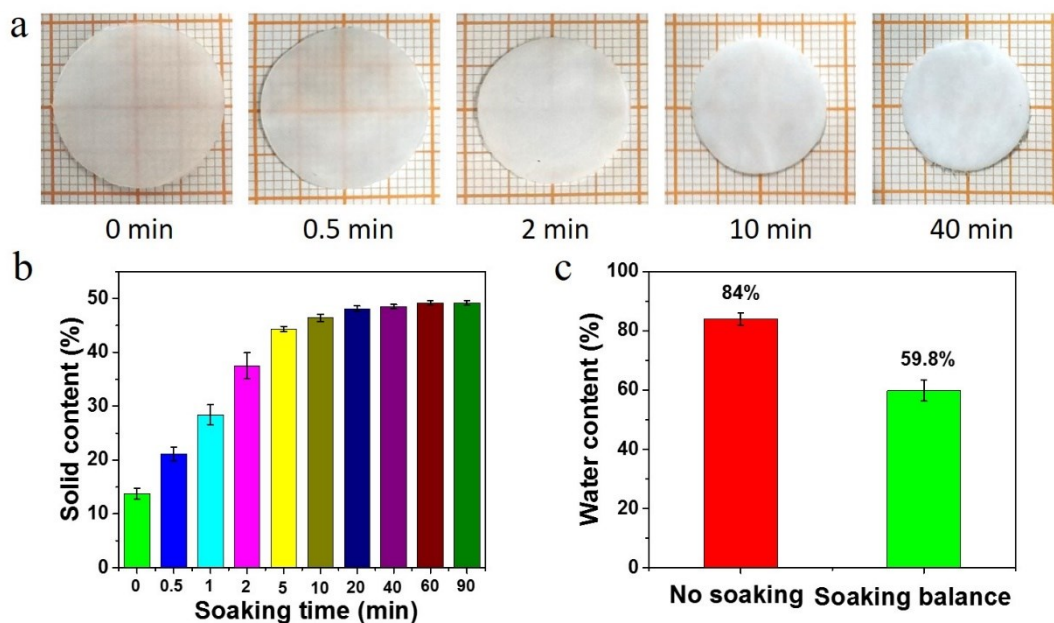

**Figure S3.** (a) Photographs of PVA hydrogel volume shrinkages with varying soaking time. (b) Solid content of PVA hydrogel with varying soaking time. (c) Water content of PVA hydrogel at no soaking and soaking balance state.

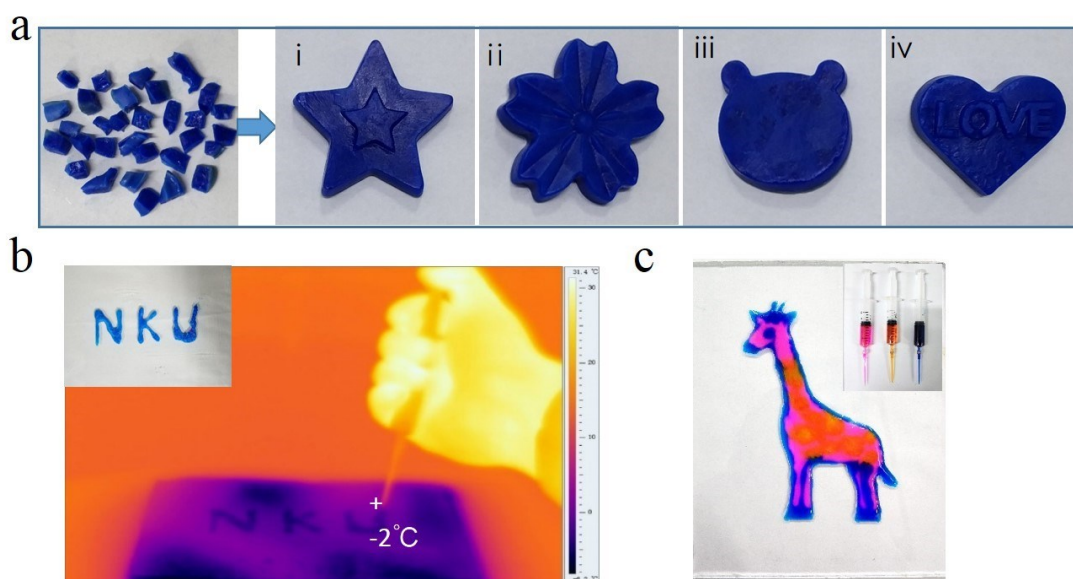

**Figure S4.** (a) Photographs showing the remoldability of the PVA hydrogels: i) pentagram, ii) flower, iii) bear, and iv) heart-shaped. (b) The IR image of the original state of PVA sol injected on an ice-bath. (c) The color circuits for PVA hydrogels by outlining the cartoon edges of a giraffe, the inset picture is syringes with different color PVA sol.

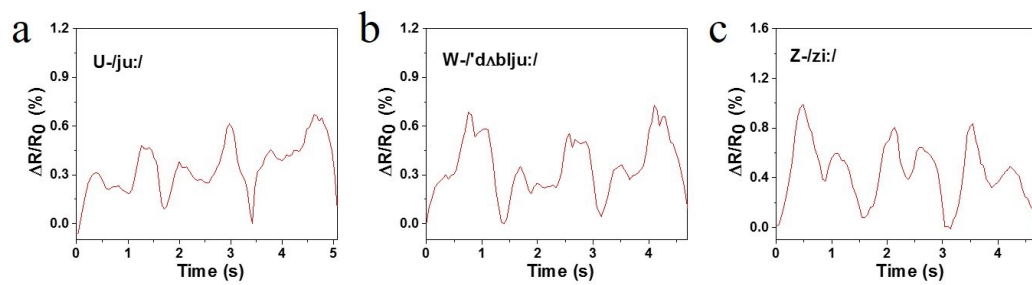

**Figure S5.** Hydrogel as an ion sensor for English alphabet recognition.
